## 31 **Introduction**

32 Uterine Natural Killer cells (uNK) are NK-like cells that are found in the lining of the uterus (called  
33 “decidua” in pregnancy and “endometrium” outside of pregnancy). They are distinct from peripheral  
34 blood NK (pNK) in both phenotype and function. Unlike pNK, uNK are only weakly cytotoxic and  
35 instead produce factors that are pro-angiogenic and that attract fetally-derived placental cells called  
36 extravillous trophoblast (EVT) (1-6). uNK are most prominent in the first trimester of pregnancy, at  
37 which time they account for 70-80% of immune cells in the decidua (7). Their prominence at the time  
38 of implantation, and production of factors that are predicted to promote trophoblast invasion and  
39 spiral artery remodeling, indicates they are likely to have a role in placental implantation.

40  
41 Further evidence for a role of uNK in implantation comes from their expression of high levels of  
42 killer-cell immunoglobulin-like receptors (KIRs), CD94/NKG2 (8, 9), and LILRB1 (9), which allows  
43 them to recognize the human leukocyte antigens (HLAs) expressed by EVT: HLA-C, HLA-E and  
44 HLA-G respectively (10-12). Immunogenetic studies demonstrate that combinations of HLA and  
45 KIR that lead to lower activation are associated with disorders of insufficient implantation such as  
46 pre-eclampsia, fetal growth restriction and recurrent miscarriage, suggesting that uNK activation via  
47 KIR is important for implantation (13-20). The increased expression of KIRs by uNK around the  
48 time of implantation provides additional support for this idea (21).

49  
50 Until recently, it was thought that uNK formed a single population, but single cell RNA sequencing  
51 (scRNAseq) has now demonstrated three subpopulations of uNKs in first trimester decidua (22).  
52 These were originally called decidual NK (dNK) -1, -2 and -3 but they have now also been found in  
53 non-pregnant endometrium (23). Here, we call these subsets “uNK1”, “uNK2”, and “uNK3” in  
54 recognition of the finding that they are not confined to the decidua. uNK1 express higher levels of  
55 KIRs and LILRB1, indicating they may be specialized to communicate with EVT (22, 24). uNK2 and  
56 uNK3 produced more cytokines upon stimulation, indicating their role may be immune defense (24).  
57 However, several questions remain open. Are these three subpopulations still present at the end of  
58 pregnancy? Do the subpopulations change in prominence and/or activity over the reproductive cycle?  
59 The answers to these questions could elucidate which subpopulations are important in implantation,  
60 parturition, and immune protection throughout the reproductive cycle.

61  
62 Here, we show that the proportions of the uNK subpopulations remain stable through the menstrual  
63 cycle, but all three are more active and express higher levels of KIR around the time of implantation.  
64 uNK1 are more prominent in the first trimester of pregnancy, potentially indicating a requirement for  
65 this subset in the mediation of implantation whereas uNK3 are the most prominent at the end of  
66 pregnancy. Overall, we outline how the three uNK subpopulations change in proportion phenotype  
67 and function throughout the reproductive cycle.

## 68 **Materials and Methods**

### 69 *Primary tissue*

70  
71 Collection of human tissue was approved by London - Chelsea Research Ethics Committee (study  
72 numbers: 10/H0801/45 and 11/LO/0971).

73  
74 29 endometrial samples were taken by Pipelle biopsy before insertion of intrauterine device for  
75 contraception. Samples taken on a day of bleeding were assigned as menstrual phase. Other samples  
76 were categorized to proliferative or secretory phase by date of last menstrual period and serum  
77 progesterone level. Samples obtained before Day 14 were assigned as proliferative phase and after  
78 day 14 as secretory phase. This was confirmed retrospectively by serum progesterone level,  
79 according to previously published reference range (25). Samples from postpartum participants were  
80 assigned by number of days from delivery of the baby up until 16 weeks post-partum.

81  
82 10 decidual samples were taken from participants undergoing surgical management of elective  
83 termination of pregnancy between 6 to 13 weeks of pregnancy and 10 from participants undergoing  
84 elective caesarean sections, over 37 weeks of pregnancy and not in labour. For labouring data, a  
85 following 8 samples were taken from participants in the early stages of labour (1-3cm cervical  
86 dilation and regular contractions) who had a caesarean section, and 5 samples were taken from  
87 participants after a vaginal birth. Matched peripheral venous blood was obtained from all patients at  
88 time of obtaining endometrial or decidual samples. Patient characteristics are summarized in Suppl  
89 tables 1 and 2.

90  
91 Lymphocytes were extracted from peripheral blood by layering onto Histopaque (Sigma Aldrich),  
92 spinning down (700 *xg*, 20 minutes, 21°C) and retrieving the interface which was washed twice with  
93 Dulbecco's Phosphate-Buffered Saline (Life Tech) (500 *xg*, 10 minutes, 4°C). Briefly, endometrial  
94 tissue was passed through 100µm cell strainer, pelleted (700 *xg*, 10 minutes, 4°C), resuspended in  
95 Dulbecco's Phosphate-Buffered Saline supplemented by 10% Fetal Calf Serum (Sigma Aldrich),  
96 passed through 70µm strainer, and layered on Histopaque as above.

97  
98 For first trimester samples, decidua compacta was extracted from products of conception and stirred  
99 for 20 minutes to remove blood before mincing with scalpel followed by GentleMACS dissociation  
100 (Miltenyi). Minced tissue was passed through 75 µm sieve, pelleted (500 *xg*, 10 minutes, 4°C) and  
101 resuspended in PBS/1% FCS before passing through 100 µm strainer. Filtrate was layered on  
102 Histopaque as above.

103  
104 For third trimester decidua basalis (DB) samples, small sections were cut from the maternal side of  
105 the placenta and washed using a magnetic stirrer in Mg<sup>2+</sup> and Ca<sup>2+</sup> free PBS (Gibco) for 20 minutes.  
106 Blood clots, vessels and placental tissue were physically removed and cleaned decidual tissue was  
107 placed in new Mg<sup>2+</sup> and Ca<sup>2+</sup> free PBS. The tissue was spun (400 *xg*, 5 mins 21°C) and PBS  
108 removed. The tissue was resuspended in Accutase (Invitrogen), mechanically digested in C tubes  
109 using a GentleMACs dissociater and placed in a 37°C shaking water bath for 45 minutes. Minced  
110 tissue was passed through a 70µm strainer, resuspended in PBS/1%FCS/2mM EDTA. Filtrate was  
111 layered on Histopaque as above. For the third trimester decidua parietalis (DP) samples, 10cm x  
112 10cm sections of the fetal membrane were dissected and the decidua removed using a cell scraper  
113 (Starsted). The tissue underwent enzymatic and mechanical digestion as described in the decidua  
114 basalis protocol.

115  
116  
117  
118  
119  
120  
121  
122  
123  
124  
125  
126  
127  
128  
129  
130  
131  
132  
133  
134  
135  
136  
137  
138  
139  
140  
141  
142  
143  
144  
145  
146  
147  
148  
149  
150  
151  
152  
153  
154  
155

Extracted lymphocytes were counted by light microscopy (Leica) with a haemocytometer. A total of 0.2 X10<sup>6</sup> to 1 X10<sup>6</sup> cells per condition were allocated for phenotype and functional assessment.

#### *Stimulation with PMA/ionomycin*

21 endometrial, all first trimester and all third trimester samples were used for functional assessment. Endometrial lymphocytes were stimulated immediately after isolation, and decidual lymphocytes were stimulated after 12 to 20 hours of rest at 37°C. Optimization experiments showed no difference between cells stimulated fresh and after rest (Supp Fig 1).

For functional assessment, cells were suspended in RPMI enriched with antibiotics, EDTA and sodium pyruvate and divided into unstimulated and stimulated wells. Anti-CD107a BV605 (100 µl/ml), Brefeldin (10µg/ml) and Monensin (2µM/ml) were added to all wells and Phorbol 12-myristate 13-acetate (PMA) (50 ng/ml) and ionomycin (1µg/ml) into the stimulated wells only. Cells were incubated for 4 hours at 37°C then stained with antibodies. For third trimester samples, cells were incubated for 6 hours with anti-CD107a, PMA and ionomycin, with Brefeldin and Monensin added 2 hours into the incubation.

#### *Single cell RNA-seq data analysis*

A scRNA seq dataset from the non-pregnant uterus (available at [www.reproductivecellatlas.org/](http://www.reproductivecellatlas.org/)) was converted from a Python format into a R Seurat object. The object was subset to cells that had been classified as “Lymphoid” or “Myeloid” under “Cell.type”, in the metadata.

A scRNAseq dataset from the first trimester uterus (available at Array Express E-MTAB-6701) was converted from .txt into a R seurat object. The object was subset to cells that had been designated an immune cell type, e.g. “dNK1” under “Annotation”, in the metadata. Cells originating from placenta or blood were removed, so only decidual cells remained. Data from one donor was removed from the analysis due to their NK cells clustering independently of all other NK cells.

The scRNAseq dataset (dbGaP phs001886.v1.p1, reanalyzed with permission of the NIH, project ID 26528) contained samples from one second trimester accreta sample and 9 third trimester participants. Both datasets were filtered, aligned and quantified using Cell Ranger software (version 5.0.1, 10x Genomics). h19 was used as a human genome reference. Downstream analyses were performed using the R package Seurat (version 4.0.2)(26). Cells with fewer than 200 genes and genes that were expressed in less than 10 cells were removed. Furthermore, cells where the gene content was greater than 10% mitochondrial genes were removed. Clusters were identified using “FindClusters” algorithm. The “FindAllMarkers” algorithm was used to identify the immune clusters, and subset the object to immune cells. Cells from placental tissue were removed. TIL and PTL samples were not included in the analysis looking at dNK across the reproductive cycle. PTL samples were not included in the term labouring analysis.

156 The four datasets were integrated based on a previously published workflow (27). Clusters that  
157 appeared to be non-immune cells were removed and the remaining cells were reanalysed using the  
158 same workflow. The algorithm “FindConservedMarkers” was used to identify the clusters dNK1,  
159 dNK2 and dNK3. This was confirmed by the metadata column “annotation” from the first trimester  
160 dataset.

#### 161 162 *Flow cytometry*

163 The following anti-human antibodies were used: Anti-CD56 Brilliant Violet (BV) 650 (clone NCAM  
164 16.2, BD Bioscience), anti-CD39 BV421 (clone A1, Biolegend), anti-CD3 BV711 (clone SK7,  
165 Biolegend), anti-CD103 BV785 (clone Ber-ACT8, Biolegend), anti-CD16 Alexa Fluor(AF)700  
166 (clone 3G8, Biolegend), anti-CD9 phycoerythrin(PE)/Dazzle 594 (clone HI9a, Biolegend), anti-  
167 CD49a PE/Cy7 (clone TS2/7, Biolegend), anti-CD45 allophycocyanin (APC) (clone HI30,  
168 Biolegend), anti-CD94 PE (Clone HP-3D9, BD Bioscience), anti-CD158a/h (KIR2DL1/DS1)  
169 VioBright 515 (clone REA1010, Miltenyi Biotec), anti-CD158b (KIR2DL2/DL3) APC vio 770  
170 (clone REA 1006, Miltenyi Biotec), CD85j (ILT2 or CD94) Peridinin chlorophyll protein (PerCP)-  
171 eFluor 710 (clone HP-F1, Thermo Fisher Scientific) and anti-CD107a BV605 (clone H4A3,  
172 Biolegend) for surface antigens, and anti-IL-8 PE (clone G265-8, BD Bioscience), anti-IFN- $\gamma$   
173 APCvio770 (clone REA600, Miltenyi Biotec), anti GM-CSF PERCP/Cyanine 5.5 (clone BVD2-  
174 21C11, Biolegend), anti-TNF $\alpha$  FITC (clone MAb11, Biolegend) for intracellular staining.  
175 Cells were first incubated with fixable viability dye (Live/Dead Fixable Aqua Dead Cell stain kit,  
176 LifeTech) (15 minutes, 4°C) followed by incubation with surface antibodies (15 minutes, 4°C). For  
177 intracellular staining, human FoxP3 buffer (BD Bioscience) was used according to manufacturer’s  
178 instructions before staining with intracellular antibodies (30 minutes, 4°C). For third trimester  
179 samples, fixable viability dye was included with the surface staining antibodies (20 minutes, RT) and  
180 intracellular staining used the Cytotfix/Cytoperm kit (BD Biosciences) according to manufacturer's  
181 instructions. Excess antibodies were washed off (5 minutes, 500  $\mu$ g, 4°C) between each incubation  
182 and twice after final incubation with intracellular antibodies.

#### 183 184 *Statistical analysis*

185 Data were acquired on an BD Fortessa and analysed using FlowJo (Tree Star, Ashland, OR).  
186 Application settings were used to ensure reproducible results. Statistical analysis were performed  
187 using PRISM (GraphPad Software Inc.). Data were assessed for normality using Shapiro-Wilk tests  
188 to determine whether a parametric or a non-parametric statistical test was appropriate. The  
189 appropriate statistical test was used to compare subsets as specified in figure legends.  $p < 0.05$  was  
190 considered significant.

#### 191 192 **Results**

193 We examined tissues and collected data at seven stages of the reproductive cycle. In the menstrual  
194 cycle there are three stages: menstrual (when the lining of the uterus is shed), proliferative (prior to  
195 ovulation) and secretory (after ovulation). Pregnancy is divided into three trimesters: first (1-12  
196 weeks), second (12-28 weeks), third (28 – 40 weeks). We also examined postpartum samples (up to  
197 16 weeks post-delivery). For the scRNAseq data, 5 stages were examined: proliferative, secretory,



198 first trimester, second trimester and third trimester. For flow cytometry, 6 stages were examined:  
199 menstrual, proliferative, secretory, first trimester, third trimester and postpartum.

200

201 During the menstrual cycle stages the uterine tissue we examined is known as the endometrium.

202 During pregnancy, this tissue undergoes a process called decidualization and results in three tissues

203 known as the decidua basalis (which lines the maternal side of the placenta), decidua parietalis

204 (which lines the rest of the uterus) and decidua capsularis (which lines the embryo on the luminal

205 side). When taking samples from first trimester tissue, it not possible to differentiate between the

206 different decidual tissues. During second trimester the decidua capsularis fuses with the decidua

207 parietalis. When taking samples from third trimester tissue, it is possible to get distinct samples from

208 the decidua basalis and the decidua parietalis.

209

210 *uNK1, -2 and -3 are present throughout the human reproductive cycle and vary in frequency*

211 scRNAseq analysis has previously identified that three subpopulations of uNK, uNK1, -2 and -3

212 present in first trimester decidua (22) and non-pregnant endometrium (23). Previous analysis of

213 scRNAseq data from third trimester decidua identified only a single cluster within the uNK

214 population (28), and our reanalysis of the third trimester dataset alone confirmed this. However,

215 when the third trimester data was integrated with data from the non-pregnant uterus, first and second

216 trimester, the third trimester dNK cells did form three clusters (Fig. 1a, b).

217

218 In the first trimester, uNK can be distinguished from circulating NK cells by their expression of

219 CD49a and CD9; the subsets are then defined by their expression of CD39 and CD103 (22). We

220 confirmed the presence of CD49a<sup>+</sup> uNK in endometrium and in first and third trimester decidua, and

221 that the three subpopulations uNK1, -2 and -3 can be identified using CD39 and CD103 (Fig 2a).

222 However, in third trimester samples there was a significant CD49a<sup>+</sup>CD9<sup>-</sup> population. A comparison

223 of CD49a<sup>+</sup>CD9<sup>+</sup> and CD49a<sup>+</sup> CD9<sup>-</sup> detected no phenotypic differences between these two

224 populations, suggesting that CD49a alone can be used to identify uNK cells in the third trimester

225 (Supp Fig 2). For consistency of gating strategy, we also identified uNK cells by their expression of

226 CD49a alone in endometrial, first trimester and postpartum samples.

227

228 In line with previous reports (7), we observed a peak in total uNK, as a proportion of total CD45<sup>+</sup>

229 lymphocytes, in first trimester pregnancy by both scRNAseq and flow cytometry (Figure 1c, Fig 2b).

230 We observed a similar proportion of total uNK in proliferative and secretory phase (Fig. 1c, 2c), in

231 contrast to a previous report of higher proportion of uNK in secretory phase (29). This may be due to

232 our use of CD49a allowing the removal of contaminating pNK from analysis, or due to their more

233 vigorous sub-classification of the secretory stage.

234

235 Next, we examined uNK 1, -2 and -3 frequency expressed as either a proportion of total CD45<sup>+</sup>

236 lymphocytes or total uNK. We observed an increase in frequency of uNK1 when transitioning from

237 secretory phase to first trimester pregnancy, but this was not sustained into third trimester decidua.

238 This observation applied to both expression of uNK1 as percentage of both CD45<sup>+</sup> lymphocytes and

239 percentage of total NK cells. (Fig. 1c and Fig 2b), and the change was significant when measured by  
240 flow cytometry.

241

242 The variation of uNK2 frequency was similar to that observed for uNK1, with a peak in the first  
243 trimester observed by scRNAseq, and flow cytometry when frequency was measured as a percentage  
244 of CD45+ lymphocytes (Fig 1c and 2b). For the latter, uNK2 were significantly higher in the first  
245 trimester, compared to the third. Further, there was an upward trend of uNK2 when transitioning  
246 from third trimester decidua to postpartum endometrium when measured as a proportion of total NK  
247 (Fig 2c).

248

249 For uNK3, there was no change in frequency through the menstrual cycle. When measured as a  
250 percentage of CD45+ lymphocytes, there was a reduction in uNK3 in third trimester decidua  
251 parietalis, compared to both first trimester decidua and third trimester decidua basalis. This was  
252 significant when measured by flow cytometry. When measuring uNK3 as a percentage of total uNK  
253 there was a dip in the first trimester and a peak in both types of third trimester decidua. This was  
254 significant when measured by flow cytometry. The discrepancy between the proportions when  
255 expressed as a percentage of CD45+ lymphocytes or total uNK cells is likely due to the change in  
256 frequency of total uNK, as a proportion of CD45+ lymphocytes.

257

258 Within the third trimester decidua, the uNK2 population appeared greater in proportion of total uNK  
259 in the decidua parietalis compared to the decidua basalis in both scRNAseq and flow cytometry,  
260 although this did not reach significance for either (Fig 1c and 2b). The uNK3 population appeared  
261 greater in the decidua basalis, compared to decidua parietalis, which was significant when measured  
262 by flow cytometry as a percentage of CD45+ lymphocytes (Fig. 1c and 2b).

263

264 *Peripheral blood NK cell frequency does not vary over the reproductive cycle or correlate with uNK*  
265 *frequency*

266 We also examined CD56Bright and Dim NK cells in matched peripheral blood by a conventional  
267 gating strategy to identify these populations. (Fig 2c). Unlike uNK, there was no variation in total  
268 CD56+pNK, CD56Bright or CD56Dim in peripheral blood when transitioning through different  
269 phases of the reproductive cycle. Furthermore, there was no significant correlation in levels of pNK  
270 and uNK subsets when expressed either as proportion of CD45+ live lymphocytes or total NK cells.  
271 (Supp Fig 3).

272

273 *uNK subsets upregulate KIR and LILRB1 during transition from non-pregnant endometrium to first*  
274 *trimester decidua*

275 We next examined uNK expression of receptors that interact with trophoblast cells: KIR2DL1 and  
276 KIR2DL2/3 recognise HLA-C, LILRB1 recognises HLA-G and CD94 recognises HLA-E (30).  
277 In line with earlier findings on first trimester uNK (22, 24), we observed that uNK1 expressed higher  
278 levels of KIR than uNK2 and -3 (Fig 3b,c). We also found that all three uNK subsets expressed  
279 increased KIR in the first trimester of pregnancy, compared to non-pregnant endometrium and third  
280 trimester decidua (Fig 3b,c). Similar to KIR, LILRB1 protein expression peaked in the first trimester,

281 although this was only statistically significant in uNK2 and uNK3 (Fig 3b). *LILRB1* transcript  
282 expression followed a similar trend, although in contrast to our findings at the protein level, *LILRB1*  
283 mRNA was not detectable in the decidua basalis (Fig 3c). At the transcript and protein level, CD94  
284 was expressed at a higher level on uNK2 and 3 compared to uNK1 (Fig.3b, c). There was a slight  
285 reduction in CD94 transcript (*KLRD1*) towards the end of pregnancy, but this was not observed at the  
286 protein level. (Fig. 3b, c)

287  
288 In line with our finding that pNK did not change in frequency over the reproductive cycle,  
289 examination of NK cells from matched blood showed no change in the frequency at which KIR,  
290 *LILRB1*, and CD94 are expressed in these cells. (Fig. 3b).

291  
292 *uNK are the most active at the time of implantation*

293 We next assessed functional responses with and without stimulation with PMA and ionomycin (Fig.  
294 4a). CD107a staining is a proxy for degranulation and previous studies have shown that this acts as a  
295 reliable measure of overall uNK activation (31). We also examined the production of IL-8 and GM-  
296 CSF, which are thought to promote EVT invasion (6, 31, 32), and the classical NK cell cytokines  
297 IFN $\gamma$  and TNF $\alpha$  (Fig. 4b).

298  
299 Degranulation in unstimulated conditions declined during the proliferative phase, slightly in uNK2  
300 and significantly in uNK3, compared the other two phases of the menstrual cycle. (Fig. 4b). At the  
301 end of pregnancy, degranulation was significantly lower in third trimester decidua parietalis  
302 compared to decidua basalis in dNK1, but this was not replicated in the other subsets. (Fig. 4b). In  
303 stimulated cells there was a reduction in degranulation in uNK2 and uNK3 in both third trimester  
304 decidua compared to first trimester decidua (Fig. 4b).

305  
306 For TNF- $\alpha$ , IFN- $\gamma$  and IL-8, we observed peaks in cytokine production across all stimulated uNK  
307 subsets during secretory phase, compared to the proliferative phase and first trimester, although this  
308 did not reach statistical significance in all cases (Fig 4b). For IL-8 in uNK3 this peak was maintained  
309 into first trimester pregnancy. This trend was also present in unstimulated cells for IL-8 (Fig 4b).

310  
311 Third trimester uNK produced less cytokine than first trimester uNK, although this only reached  
312 significance in IL-8 production from uNK3. This reduction in cytokine production through  
313 pregnancy was also seen at the mRNA level for IL-8 (Fig. 4c). In contrast, GM-CSF protein  
314 production was consistently low in the menstrual cycle, including the secretory phase, but increased  
315 significantly in the first trimester of pregnancy in unstimulated uNK1 and stimulated uNK3. (Fig.  
316 4b).

317  
318 For examination of NK cells from matched peripheral blood, data from CD56Brights and Dims are  
319 shown together due to downregulation of CD16 after stimulation. Aside from a significant decline in  
320 CD107a expression in unstimulated cells when transitioning from secretory phase to first trimester  
321 pregnancy, there were no distinct trend in both stimulated and unstimulated cells (Fig. 4b).



322 The mRNA expression of other NK cell proteins of interest across the reproductive cycle, such as  
323 granzymes, that were not included in the flow cytometry panel, can be seen in the supplementary  
324 figures 4 and 5.

325

326 *uNK phenotype and function do not change in labour*

327 In line with previous findings (33, 34), we did not observe any change in the proportion of total uNK  
328 in labouring compared to non-labouring decidua (Fig 5b). The proportion of uNK in non-labouring  
329 decidua was lower in the decidua parietalis compared to the decidua basalis (Fig 5b). This is in  
330 contrast to a previous report which found a higher frequency of CD56 bright NK cells in the  
331 parietalis than the basalis (35). However, the lack of tissue-specific markers means that it is difficult  
332 to be sure if these all represent uNK.

333

334 We next examined the uNK subpopulations in non-labour compared to early labour and established  
335 labour samples. We observed no change in the frequency of any of the uNK or pNK subsets across  
336 the spectrum of these samples (Fig. 5a and 5b). The receptors examined were also stable during  
337 labour (Supp Fig 6), an observation that suggests that EVT cross-talk with uNK is not a major  
338 participant in labour. Similarly, for those markers examined, the function of uNK and pNK subsets  
339 remain stable during labour, although we did observe that, regardless of labouring state, the uNK1  
340 population in the decidua basalis is significantly more active than the population in the decidua  
341 parietalis (Figure 5 and supp fig 7). This is supported by the low number of differentially expressed  
342 genes across all three uNK subsets in the scRNAseq data comparing non-labour to labour samples  
343 (Supp table 3).

344

## 345 **Discussion**

346 To our knowledge, this is the first study to track the three uNK subpopulations throughout the  
347 reproductive cycle, looking at their frequency, phenotypes and functions. In line with previous  
348 studies, we found that the total uNK population peaked during the first trimester of pregnancy (7,  
349 36). We discovered that uNK1 and uNK2 peak in this period, but that uNK3 peaks towards the end of  
350 pregnancy. This aligns with a recent report that KIR+CD39+ uNK (mostly representing uNK1) and  
351 KIR+CD39- (mostly representing uNK2) increase in frequency towards the end of the menstrual  
352 cycle and remain elevated in early pregnancy (37). Both these reports support the proposal that uNK1  
353 communicate with EVTs in early pregnancy (22, 24), but may also point to a role for uNK2 in this  
354 process.

355

356 It has previously been reported that KIR expression by total uNK increases in the first trimester,  
357 compared to non-pregnant endometrium (21). Our finding that the major KIR-expressing subset,  
358 uNK1, is most frequent in the first trimester might suggest that this increase in KIR expression is at  
359 least partially a result of greater prominence of uNK1 but interestingly, all three uNK subsets express  
360 increased KIR in the first trimester of pregnancy. A similar trend was seen for LILRB1. This  
361 suggests that all uNK subpopulations increase their ability to recognise EVT, via HLA-C and HLA-  
362 G, in the first trimester. In comparison, CD94 expression was higher on uNK2 and -3 subsets  
363 compared to uNK1. This is in contrast with previous findings (24). However, this measured marker

364 intensity on recovered cryopreserved cells, whereas we report percentage of CD94+ fresh cells.  
365 Therefore, it is possible that the freezing process preferentially killed CD94- uNK1 cells or uNK1  
366 have a lower percentage of cells expressing CD94, but have a higher expression per cell.

367  
368 By examining degranulation as a proxy for general NK cell activation (31), we found that uNK were  
369 typically most active at around the time of implantation, in the secretory phase of the menstrual cycle  
370 and the first trimester of pregnancy. This is in line with previous findings that first trimester uNK are  
371 more able to degranulate in response to HCMV-infected targets than those at term, although the same  
372 study found that, following IL-15 stimulation, term uNK are better able to degranulate in response to  
373 PMA and ionomycin than first trimester cells (9). Without stimulation, uNK produce little IFN $\gamma$ , IL-  
374 8, TNF $\alpha$  and GM-CSF. However, after stimulation with PMA and ionomycin, uNK have the highest  
375 ability to produce most of these cytokines during the secretory phase, except for GM-CSF, whose  
376 production peaks in the first trimester. This finding is interesting because the timing of maximum  
377 activation coincides with the window of implantation, suggesting that uNK may have a role in  
378 coordinating successful implantation.

379  
380 Cumulative evidence indicates an important physiological role for uNK in first trimester pregnancy,  
381 but there is conflicting evidence on their role in reproductive failure. Our findings and those of others  
382 (22, 24) point to uNK1 as the uNK subset more likely to mediate placental implantation in early  
383 pregnancy. Future studies focusing specifically on this subset may be able to elucidate differences  
384 that were previously masked due to examination of uNK as a bulk population. A recent study using  
385 scRNAseq suggests that there is a reduction of uNK1 in pathological pregnancies (38); however,  
386 these findings need to be interpreted with caution because the pathological samples were collected  
387 after pregnancy loss, making it difficult to discern if changes seen in immune cells are a cause or an  
388 effect, due to inflammatory changes that typically occur after fetal demise. To overcome this, future  
389 studies could interrogate uNK during window of implantation (39) or from elective termination of  
390 pregnancy samples stratified to low and high risk by uterine artery doppler which has high specificity  
391 in predicting risk of pre-eclampsia and intrauterine growth restriction (40).

392  
393 In the third trimester the majority of uNK cells are uNK3, which express low levels of KIRs and  
394 LILRB1. This could suggest that, in contrast to early pregnancy, the major role for uNK in late  
395 pregnancy does not involve interactions with EVT. Similarly, the expression of the functional  
396 markers we examined was lower in the third trimester. This could indicate that, if these cells have a  
397 role at the end of pregnancy, it is via a different mechanism of action. Intriguingly, by scRNAseq,  
398 uNK3 were the most transcriptionally different between non-labouring and labouring states,  
399 suggesting they may have a role in labour that is yet to be defined. It would be interesting to do a  
400 broader analysis of these cells, or examine how they look in pathological cases such as pre-eclampsia  
401 or preterm birth.

402  
403 In conclusion, we show here how uNK subset number, expression of receptors and function change  
404 dynamically across the healthy reproductive cycle. This provides evidence on their physiological role  
405 in implantation, but will also provide an important platform from which the relationship between

406 uNK function and pathologies of pregnancy associated with impaired implantation and placentation  
407 can be investigated.

408 **Conflict of Interest**

409 The authors declare that the research was conducted in the absence of any commercial or financial  
410 relationships that could be construed as a potential conflict of interest.

411

412 **Author Contributions**

413 EMV, EVW and VM designed the study, analysed results and wrote the manuscript. EMV, EVW and  
414 AOC carried out experiments. EVW, BB and MRJ consented patients and collected clinical samples.  
415 All others contributed to editing the manuscript.

416

417 **Funding**

418 This study was funded by Borne.

419

420 **Acknowledgements**

421 We would like to thank all the people from Chelsea and Westminster Hospital, West Middlesex  
422 University Hospital and John Hunter Clinic (London, UK) who contributed samples to this study. We  
423 would also like to thank Dr Pei Lai, Dr Nishel Shah, Miss Sharmista Guha and all the clinical staff  
424 who helped in the collection of samples.

425

426

## 427 **References**

- 428 1. Abadía-Molina AC, Ruiz C, Montes MJ, King A, Loke YW, Olivares EG. Immune phenotype and  
429 cytotoxic activity of lymphocytes from human term decidua against trophoblast. *J Reprod Immunol.*  
430 1996;31(1-2):109-23.
- 431 2. King A, Birkby C, Loke YW. Early human decidual cells exhibit NK activity against the K562 cell  
432 line but not against first trimester trophoblast. *Cell Immunol.* 1989;118(2):337-44.
- 433 3. Koopman LA, Kopcow HD, Rybalov B, Boyson JE, Orange JS, Schatz F, et al. Human decidual  
434 natural killer cells are a unique NK cell subset with immunomodulatory potential. *J Exp Med.*  
435 2003;198(8):1201-12.
- 436 4. Kopcow HD, Allan DS, Chen X, Rybalov B, Andzelm MM, Ge B, et al. Human decidual NK cells  
437 form immature activating synapses and are not cytotoxic. *Proc Natl Acad Sci U S A.* 2005;102(43):15563-8.
- 438 5. Siewiera J, El Costa H, Tabiasco J, Berrebi A, Cartron G, Le Bouteiller P, et al. Human  
439 cytomegalovirus infection elicits new decidual natural killer cell effector functions. *PLoS Pathog.*  
440 2013;9(4):e1003257.
- 441 6. Hanna J, Goldman-Wohl D, Hamani Y, Avraham I, Greenfield C, Natanson-Yaron S, et al. Decidual  
442 NK cells regulate key developmental processes at the human fetal-maternal interface. *Nat Med.*  
443 2006;12(9):1065-74.
- 444 7. Williams PJ, Searle RF, Robson SC, Innes BA, Bulmer JN. Decidual leucocyte populations in early to  
445 late gestation normal human pregnancy. *J Reprod Immunol.* 2009;82(1):24-31.
- 446 8. King A, Hiby SE, Verma S, Burrows T, Gardner L, Loke YW. Uterine NK cells and trophoblast HLA  
447 class I molecules. *Am J Reprod Immunol.* 1997;37(6):459-62.
- 448 9. de Mendonça Vieira R, Meagher A, Crespo Â, Kshirsagar SK, Iyer V, Norwitz ER, et al. Human  
449 Term Pregnancy Decidual NK Cells Generate Distinct Cytotoxic Responses. *J Immunol.* 2020;204(12):3149-  
450 59.
- 451 10. King A, Boocock C, Sharkey AM, Gardner L, Beretta A, Siccardi AG, et al. Evidence for the  
452 expression of HLAA-C class I mRNA and protein by human first trimester trophoblast. *J Immunol.*  
453 1996;156(6):2068-76.
- 454 11. King A, Allan DS, Bowen M, Powis SJ, Joseph S, Verma S, et al. HLA-E is expressed on trophoblast  
455 and interacts with CD94/NKG2 receptors on decidual NK cells. *Eur J Immunol.* 2000;30(6):1623-31.
- 456 12. Kovats S, Main EK, Librach C, Stubblebine M, Fisher SJ, DeMars R. A class I antigen, HLA-G,  
457 expressed in human trophoblasts. *Science.* 1990;248(4952):220-3.
- 458 13. Hiby SE, Regan L, Lo W, Farrell L, Carrington M, Moffett A. Association of maternal killer-cell  
459 immunoglobulin-like receptors and parental HLA-C genotypes with recurrent miscarriage. *Hum Reprod.*  
460 2008;23(4):972-6.
- 461 14. Johnsen GM, Størvold GL, Drabbels JJM, Haasnoot GW, Eikmans M, Spruyt-Gerritse MJ, et al. The  
462 combination of maternal KIR-B and fetal HLA-C2 is associated with decidua basalis acute atherosclerosis in  
463 pregnancies with preeclampsia. *J Reprod Immunol.* 2018;129:23-9.
- 464 15. Moffett A, Chazara O, Colucci F, Johnson MH. Variation of maternal KIR and fetal HLA-C genes in  
465 reproductive failure: too early for clinical intervention. *Reprod Biomed Online.* 2016;33(6):763-9.
- 466 16. Cartwright JE, Fraser R, Leslie K, Wallace AE, James JL. Remodelling at the maternal-fetal interface:  
467 relevance to human pregnancy disorders. *Reproduction.* 2010;140(6):803-13.
- 468 17. Hiby SE, Walker JJ, O'shaughnessy KM, Redman CW, Carrington M, Trowsdale J, et al.  
469 Combinations of maternal KIR and fetal HLA-C genes influence the risk of preeclampsia and reproductive  
470 success. *J Exp Med.* 2004;200(8):957-65.
- 471 18. Hiby SE, Apps R, Sharkey AM, Farrell LE, Gardner L, Mulder A, et al. Maternal activating KIRs  
472 protect against human reproductive failure mediated by fetal HLA-C2. *J Clin Invest.* 2010;120(11):4102-10.
- 473 19. Kennedy PR, Chazara O, Gardner L, Ivarsson MA, Farrell LE, Xiong S, et al. Activating KIR2DS4 Is  
474 Expressed by Uterine NK Cells and Contributes to Successful Pregnancy. *J Immunol.* 2016;197(11):4292-300.
- 475 20. Nakimuli A, Chazara O, Hiby SE, Farrell L, Tukwasibwe S, Jayaraman J, et al. A KIR B centromeric  
476 region present in Africans but not Europeans protects pregnant women from pre-eclampsia. *Proc Natl Acad  
477 Sci U S A.* 2015;112(3):845-50.
- 478 21. Male V, Sharkey A, Masters L, Kennedy PR, Farrell LE, Moffett A. The effect of pregnancy on the  
479 uterine NK cell KIR repertoire. *Eur J Immunol.* 2011;41(10):3017-27.



- 480 22. Vento-Tormo R, Efremova M, Botting RA, Turco MY, Vento-Tormo M, Meyer KB, et al. Single-cell  
481 reconstruction of the early maternal-fetal interface in humans. *Nature*. 2018;563(7731):347-53.
- 482 23. Garcia-Alonso L, Handfield L-F, Roberts K, Nikolakopoulou K, Fernando RC, Gardner L, et al.  
483 Mapping the temporal and spatial dynamics of the human endometrium *in vivo* and *in*  
484 *vitro*. Preprint BioRxiv. 2021:2021.01.02.425073.
- 485 24. Huhn O, Ivarsson MA, Gardner L, Hollinshead M, Stinchcombe JC, Chen P, et al. Distinctive  
486 phenotypes and functions of innate lymphoid cells in human decidua during early pregnancy. *Nat Commun*.  
487 2020;11(1):381.
- 488 25. Stricker R, Eberhart R, Chevailler MC, Quinn FA, Bischof P. Establishment of detailed reference  
489 values for luteinizing hormone, follicle stimulating hormone, estradiol, and progesterone during different  
490 phases of the menstrual cycle on the Abbott ARCHITECT analyzer. *Clin Chem Lab Med*. 2006;44(7):883-7.
- 491 26. Hao Y, Hao S, Andersen-Nissen E, Mauck WM, Zheng S, Butler A, et al. Integrated analysis of  
492 multimodal single-cell data. *Cell*. 2021;184(13):3573-87.e29.
- 493 27. Stuart T, Butler A, Hoffman P, Hafemeister C, Papalexi E, Mauck WM, et al. Comprehensive  
494 Integration of Single-Cell Data. *Cell*. 2019;177(7):1888-902.e21.
- 495 28. Pique-Regi R, Romero R, Tarca AL, Sandler ED, Xu Y, Garcia-Flores V, et al. Single cell  
496 transcriptional signatures of the human placenta in term and preterm parturition. *Elife*. 2019;8.
- 497 29. Flynn L, Byrne B, Carton J, Kelehan P, O'Herlihy C, O'Farrelly C. Menstrual cycle dependent  
498 fluctuations in NK and T-lymphocyte subsets from non-pregnant human endometrium. *Am J Reprod*  
499 *Immunol*. 2000;43(4):209-17.
- 500 30. Parham P. NK cells and trophoblasts: partners in pregnancy. *J Exp Med*. 2004;200(8):951-5.
- 501 31. Xiong S, Sharkey AM, Kennedy PR, Gardner L, Farrell LE, Chazara O, et al. Maternal uterine NK  
502 cell-activating receptor KIR2DS1 enhances placentation. *J Clin Invest*. 2013;123(10):4264-72.
- 503 32. De Oliveira LG, Lash GE, Murray-Dunning C, Bulmer JN, Innes BA, Searle RF, et al. Role of  
504 interleukin 8 in uterine natural killer cell regulation of extravillous trophoblast cell invasion. *Placenta*.  
505 2010;31(7):595-601.
- 506 33. Hamilton S, Oomomian Y, Stephen G, Shynlova O, Tower CL, Garrod A, et al. Macrophages  
507 infiltrate the human and rat decidua during term and preterm labor: evidence that decidual inflammation  
508 precedes labor. *Biol Reprod*. 2012;86(2):39.
- 509 34. Rinaldi SF, Makieva S, Saunders PT, Rossi AG, Norman JE. Immune cell and transcriptomic analysis  
510 of the human decidua in term and preterm parturition. *Mol Hum Reprod*. 2017;23(10):708-24.
- 511 35. Sindram-Trujillo A, Scherjon S, Kanhai H, Roelen D, Claas F. Increased T-cell activation in decidua  
512 parietalis compared to decidua basalis in uncomplicated human term pregnancy. *Am J Reprod Immunol*.  
513 2003;49(5):261-8.
- 514 36. Pace D, Morrison L, Bulmer JN. Proliferative activity in endometrial stromal granulocytes throughout  
515 menstrual cycle and early pregnancy. *J Clin Pathol*. 1989;42(1):35-9.
- 516 37. Strunz B, Bister J, Jönsson H, Filipovic I, Crona-Guterstam Y, Kvedaraitė E, et al. Continuous human  
517 uterine NK cell differentiation in response to endometrial regeneration and pregnancy. *Sci Immunol*.  
518 2021;6(56).
- 519 38. Wang F, Jia W, Fan M, Shao X, Li Z, Liu Y, et al. Single-cell Immune Landscape of Human  
520 Recurrent Miscarriage. *Genomics Proteomics Bioinformatics*. 2021.
- 521 39. Tuckerman E, Mariee N, Prakash A, Li TC, Laird S. Uterine natural killer cells in peri-implantation  
522 endometrium from women with repeated implantation failure after IVF. *J Reprod Immunol*. 2010;87(1-2):60-  
523 6.
- 524 40. Fraser R, Whitley GS, Thilaganathan B, Cartwright JE. Decidual natural killer cells regulate vessel  
525 stability: implications for impaired spiral artery remodelling. *J Reprod Immunol*. 2015;110:54-60.

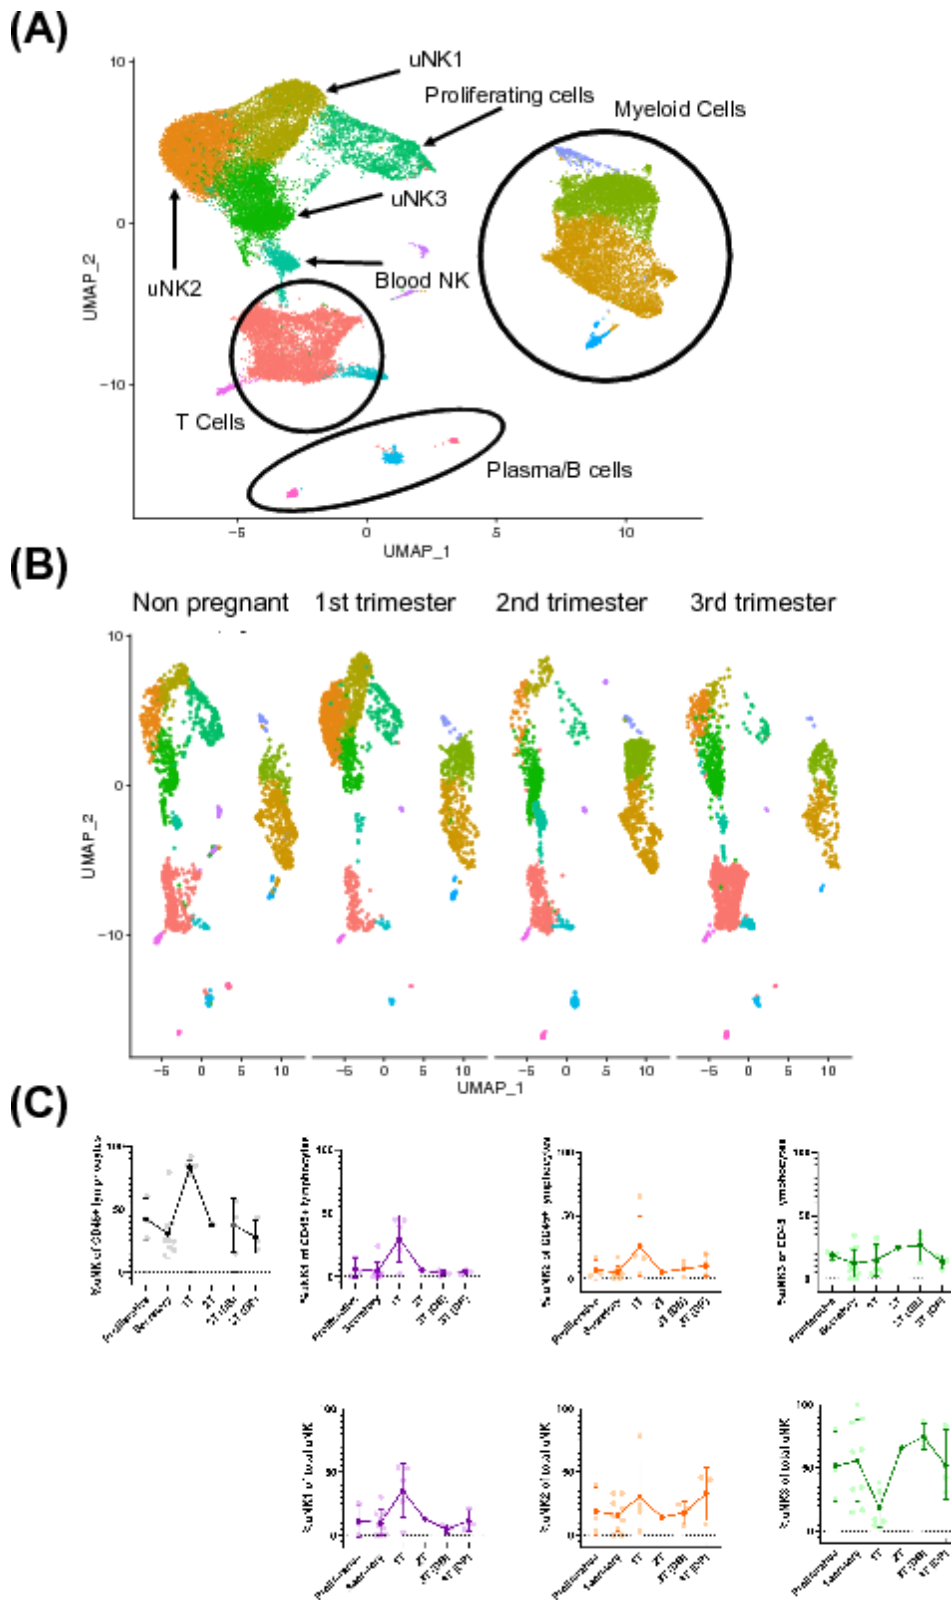

527  
528

529

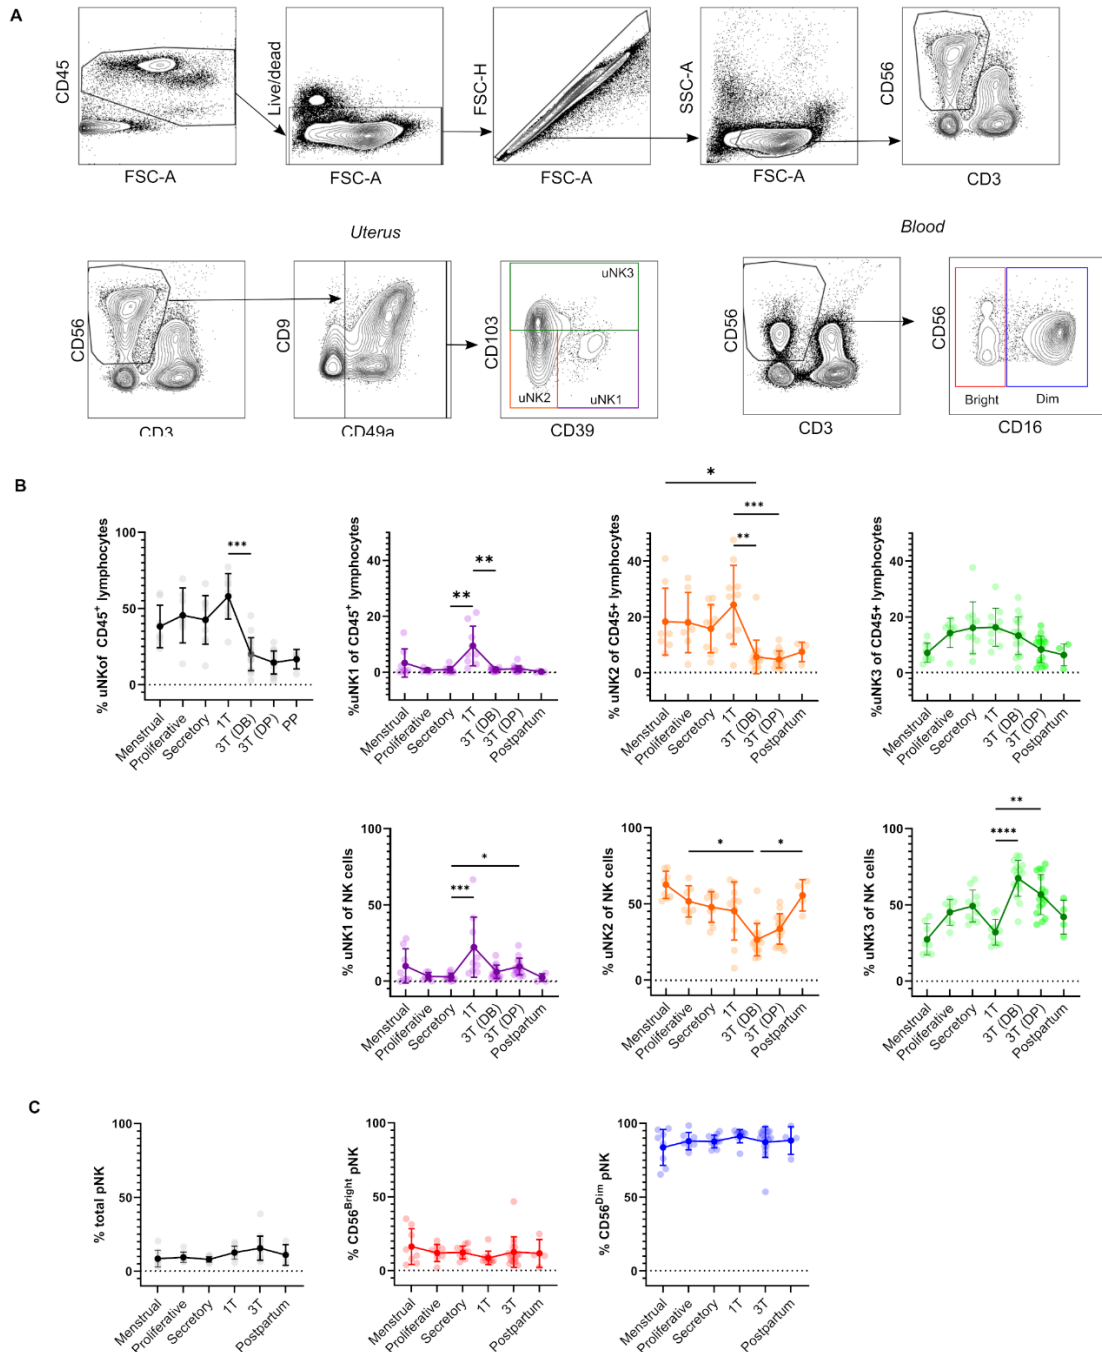

530

531

532

533

534

535

536

537

538

539

540

Figure 2 – uNK1, -2 and -3 are present throughout the human reproductive cycle, by flow cytometry

(A) FACS gating strategy used to identify three uNK subsets and pNK (representative example shown). Coloured boxes in final plot indicate colour used for that subset in subsequent graphs. (B) Using flow cytometry data, graphs show frequency of total NK from CD45<sup>+</sup> lymphocytes and then frequency of each uNK subset (uNK1, -2 -3) both as a proportion of CD45<sup>+</sup> lymphocytes and proportion of total uNK cells. Means and standard deviations are shown for n = 8 (menstrual), n = 7 (proliferative), n = 10 (secretory) n= 10 (1T), n= 16 (3T DB), n = 16 (3T DP), n = 4 (postpartum). Statistical testing was done using Kruskal Wallis with a post-hoc Dunn test \* p < 0.05, \*\* p < 0.01, \*\*\* p < 0.001 \*\*\*\* p < 0.0001 (C) Using flow cytometry data, graphs show frequency of total NK from CD45<sup>+</sup> lymphocytes and then frequency of each pNK subset (CD56<sup>Bright</sup> and CD56<sup>Dim</sup>) as a proportion of total pNK. n numbers for each group are the same as B. DB, decidua basalis; DP, decidua parietalis; 1T, first trimester; 2T, second trimester; 3T, third trimester.

541

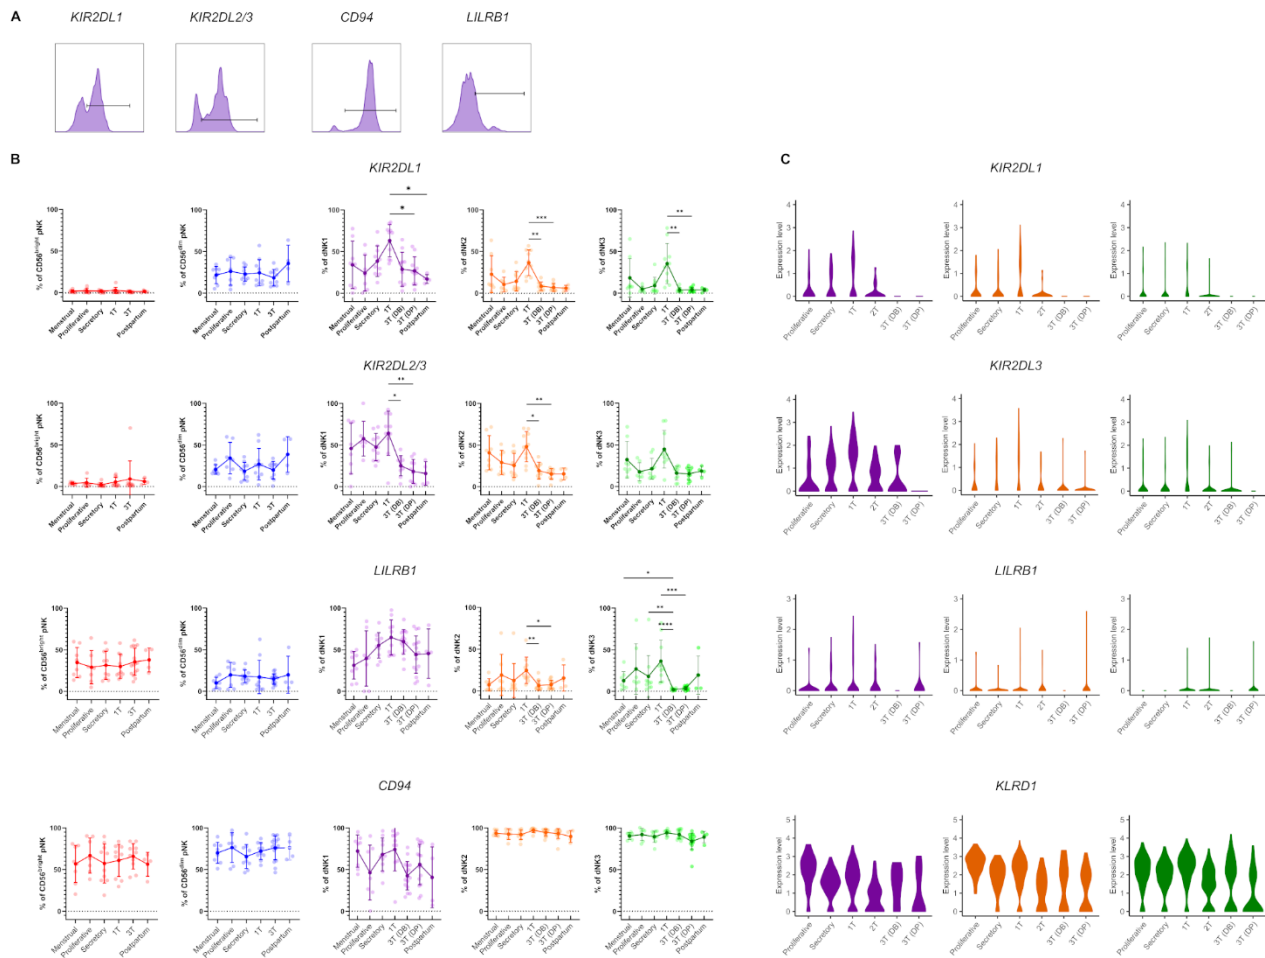

542

543

544 *Figure 3 – uNK upregulate expression of KIR and LILRB1 in first trimester*

545 **(A)** Uterine and peripheral NK cells taken at different stages of the reproductive cycle were freshly stained for phenotypic

546 markers. Representative staining from secretory phase uNK1 is shown. The positive gates were set by reference to FMO

547 controls. **(B)** Graphs showing frequencies of KIR2DL1, KIR2DL2/3, LILRB1 and CD94 on pNK and uNK subsets.

548 Means and standard deviations are shown for n = 8 (menstrual), n = 7 (proliferative), n = 10 (secretory) n = 10 (1T), n = 16

549 (3T DB), n = 16 (3T DP), n = 4 (postpartum). Statistical testing was done using Kruskal Wallis with a post-hoc Dunn test

550 \* p < 0.05, \*\* p < 0.01, \*\*\* p < 0.001. **(C)** Violin plots showing corresponding mRNA expression in uNK subsets over

551 the reproductive cycle as determined by scRNAseq. DB, decidua basalis; DP, decidua parietalis; 1T, first trimester; 2T,

552 second trimester; 3T, third trimester.

553

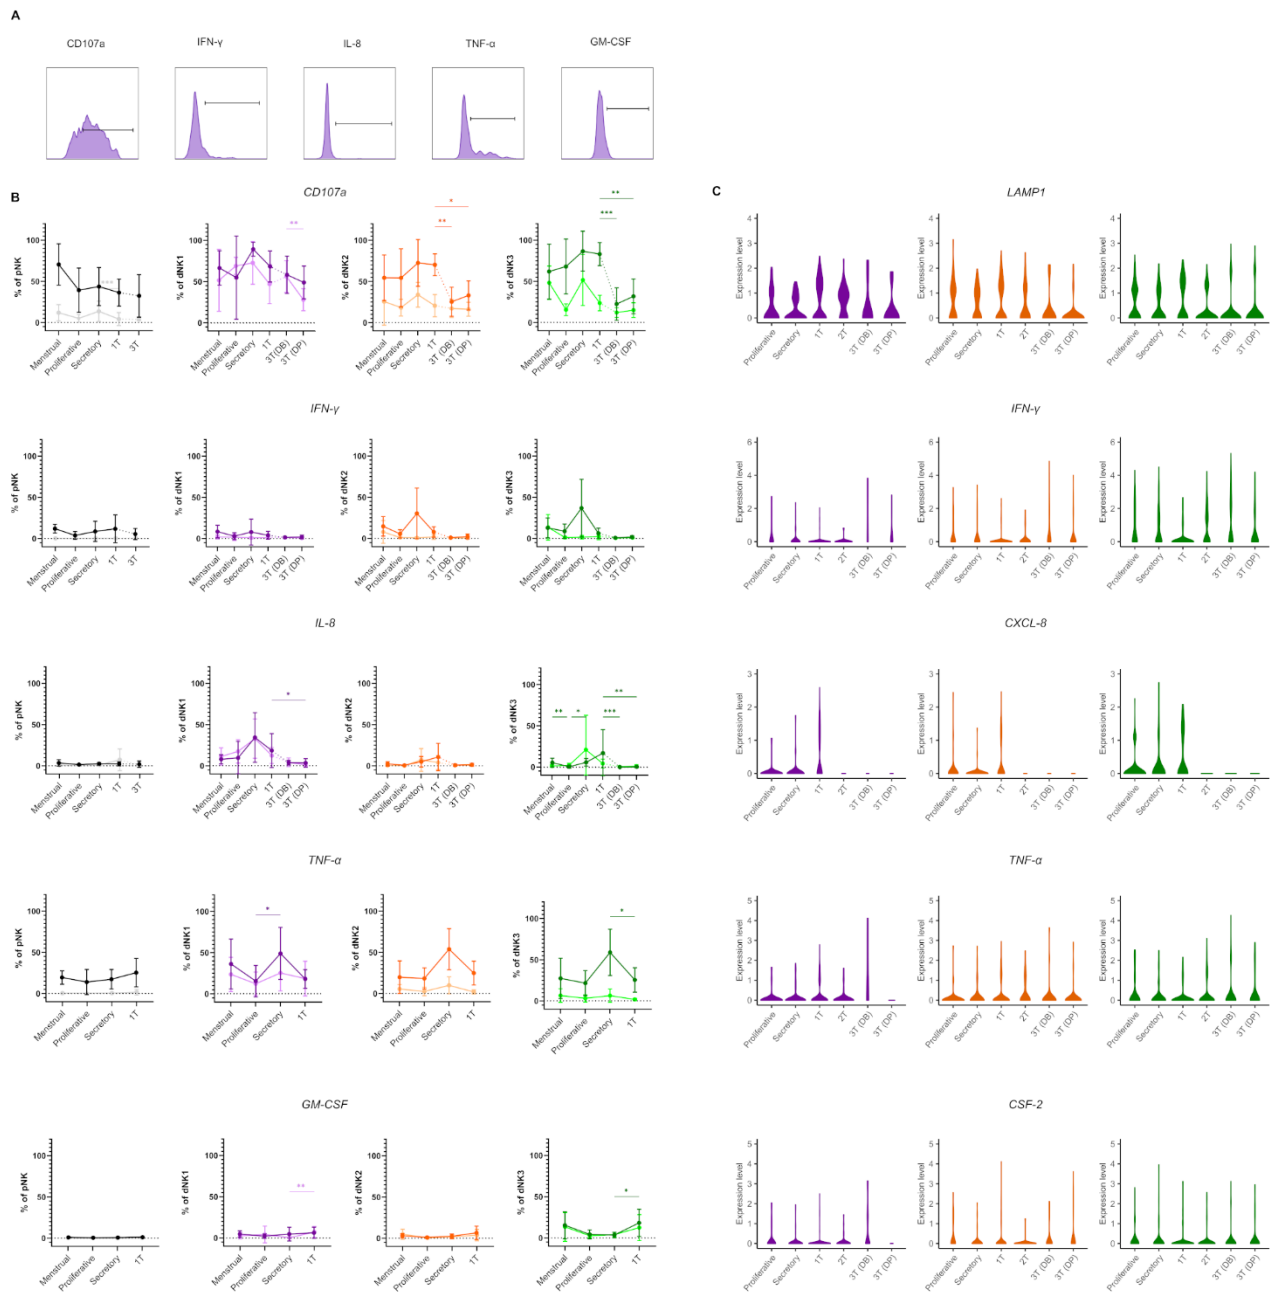

554

555

556

*Figure 4 uNK are most active at the time of implantation.*

557

(A) Uterine and peripheral NK cells taken at different stages of the reproductive cycle were cultured with or without PMA and ionomycin stimulation and assessed for degranulation (CD107a) and production of IFN $\gamma$ , IL-8, TNF $\alpha$  and GM-CSF. Representative staining from secretory phase uNK1 is shown. The positive gates were set by reference to FMO

558  
559  
560

561

Unstimulated cells are represented by lighter lines and stimulated cells by darker lines. Means and standard deviations are shown for n = 5 (menstrual), n = 6 (proliferative), n = 10 (secretory) n = 10 (1T), n = 16 (3T DB), n = 16 (3T DP).

562

563

Statistical testing was done using Kruskal Wallis with a post-hoc Dunn test \* p < 0.05, \*\* p < 0.001, \*\*\* p < 0.0001. (C) Violin plots showing corresponding mRNA expression in uNK subsets over the reproductive cycle as determined by scRNAseq. DB, decidua basalis; DP, decidua parietalis; 1T, first trimester; 2T, second trimester; 3T, third trimester.

564  
565  
566

566



567

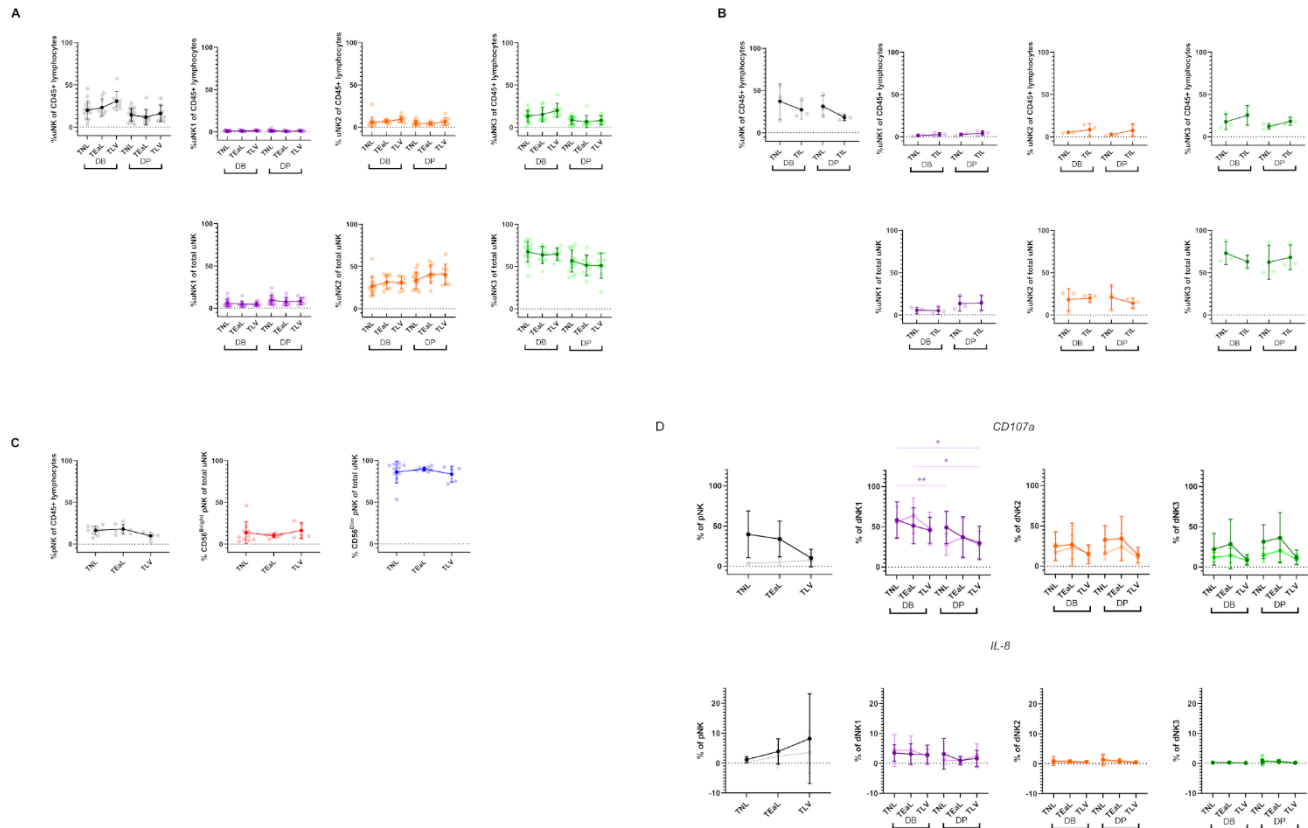

568

569

570 *Figure 5 – uNK phenotype and function do not change in labour*

571 **(A)** The FACs gating strategy shown in **Figure 2A** was used to identify the three uNK subsets. Graphs show frequency of  
572 total NK from CD45+ lymphocytes and then frequency of each uNK subset (uNK1, -2 -3) both as a proportion of CD45+  
573 lymphocytes and proportion of total uNK cells. Graphs are divided to show results from both decidua basalis and decidua  
574 parietalis. Means and standard deviations are shown for n = 16 (TNL), n = 9 (TEaL), n = 9 (TLV). Statistical testing was  
575 done using Kruskal Wallis with a post-hoc Dunn test \* p < 0.05. **(B)** Using the scRNA seq dataset, graphs show  
576 frequency of total NK from CD45+ lymphocytes and then frequency of each uNK subset (uNK1, -2 -3) both as a  
577 proportion of CD45+ lymphocytes and proportion of total uNK cells. Graphs are divided to show results from both  
578 decidua basalis and decidua parietalis. Means and standard deviations are shown for n = 3 (TNL), n = 3 (TIL). **(C)** The  
579 FACs gating strategy shown in Figure 2C was used to identify the two pNK subsets. Using flow cytometry data, graphs  
580 show frequency of total NK from CD45+ lymphocytes and then frequency of each pNK subset (CD56Bright and  
581 CD56Dim) from total NK. n numbers for each group are the same as **(A)**. **(D)** Uterine and peripheral NK cells were  
582 cultured as described in **Figure 4A**. Graphs showing frequencies of CD107a and IL-8 on pNK and uNK subsets.  
583 Unstimulated cells are represented by lighter lines and stimulated cells by darker lines. n numbers for each group are the  
584 same as **(A)**. Statistical testing was done using Kruskal Wallis with a post-hoc Dunn test \* p < 0.05. DB, decidua basalis;  
585 DP, decidua parietalis; TNL, term non-labouring; TEaL, term early labouring; TLV, term vaginal birth; TIL, term in  
586 labour
